# Supplementary material
Source: bioRxiv or medRxiv preprint supplement (https://medrxiv.org/highwire/filestream/80649/field_highwire_adjunct_files/2/2020.05.08.20095943-2.pdf)
Supplement: Supplementary file [file 2020.05.08.20095943-2.pdf]

## Appendix 1

### *Test performed*

In Ecuador, since the start of the outbreak, a total of 19,875 tests have been carried out nationwide, which results in 1,126 tests per million inhabitants. Of the accumulated total, 48% of these were positive and less than 0.5% were not conclusive or suspicious. There were 12,751 unprocessed tests up to April 18<sup>th</sup>, 2020 even though nasopharyngeal swab samples were taken (Supplementary Figure 2 and Appendix 2).

On average, 67% (n = 13,362) of test were performed by the National Institute for Public Health Research (INSPI), 4% (n = 709) by Public Hospitals, 26% (n = 5,222) by privately own laboratories and 3% (n = 582) by one University-driven laboratory. In terms of positive testing rates (PTR%), 69% of the results coming from INPSI came out positive, followed by 47% from private labs, 37% from Hospital based laboratories and 7% from University-driven labs (Supplementary Table 3 and File 1).

It is important to note that the highest rates were in cantons from the Galapagos Islands. Isabela has the highest testing rate per 100,000(4,393 per 100,000), followed by San Cristobal (1,841 per 100,000) and Santa Cruz (1,462 per 100,000). Inland, Samborondon occupies the first place with 765 tests per 100,000 people, followed by the Amazonian canton of Palora (285 per 100,000), Guayaquil (278 per 100,000) and Daule (278 per 100,000)
